# Supplementary material
Source: PubMed Central journal article supplement (PMC6944068)
Supplement: NIHMS1064116-supplement-SI.pdf [file NIHMS1064116-supplement-SI.pdf]

## Supplementary Information

### Nitrous Oxide Is a Potent Inhibitor of Bacterial Reductive Dechlorination

Yongchao Yin,<sup>†,‡,#</sup> Jun Yan,<sup>†,||</sup> Gao Chen,<sup>‡,§</sup> Fadime Kara Murdoch,<sup>†,‡,#</sup> Nina Pfisterer,<sup>†,‡,∇</sup> and Frank E. Löffler<sup>\*†,‡,§,⊥,#</sup>

<sup>†</sup>Department of Microbiology, <sup>‡</sup>Center for Environmental Biotechnology, <sup>§</sup>Department of Civil and Environmental Engineering, <sup>⊥</sup>Department of Biosystems Engineering and Soil Science, University of Tennessee, Knoxville, Tennessee 37996, United States

<sup>||</sup>Key Laboratory of Pollution Ecology and Environmental Engineering, Institute of Applied Ecology, Chinese Academy of Sciences, Liaoning 110016, People's Republic of China

<sup>#</sup>Biosciences Division, Oak Ridge National Laboratory, Oak Ridge, Tennessee 37831, United States

**\*Corresponding author:**

Phone: (865) 974-4933; E-mail: frank.loeffler@utk.edu

<sup>∇</sup>**Present address.** RNA Biology and Molecular Physiology, Faculty of Biology, Bielefeld University, Bielefeld 101133, Germany

**This supplementary file contains:** 6 tables and 3 figures on 7 pages.

Supplementary Tables S1-S6 (pages 2-4); Supplementary Figures S1-S3 (pages 5-7)

**Table S1.** Inhibition models used in whole cell suspension assays.

|                                                                                                                                                                            |                                                                                        |
|----------------------------------------------------------------------------------------------------------------------------------------------------------------------------|----------------------------------------------------------------------------------------|
| Michaelis-Menten Equation:<br>$v_0 = \frac{V_{\max} [S]}{K_m + [S]} \quad (1)$                                                                                             | Noncompetitive inhibition:<br>$v_0 = \frac{V_{\max} [S]}{\alpha(K_m + [S])} \quad (3)$ |
| Competitive inhibition:<br>$v_0 = \frac{V_{\max} [S]}{(\alpha K_m + [S])} \quad (2)$                                                                                       | Uncompetitive inhibition:<br>$v_0 = \frac{V_{\max} [S]}{(K_m + \alpha[S])} \quad (4)$  |
| For simplification, the inhibitor concentrations and inhibition constants in equations (2), (3) and (4) are expressed as $\alpha$ , whereby $\alpha = 1 + \frac{[I]}{K_i}$ |                                                                                        |

**Table S2.** Initial PCE-to-cDCE dechlorination rates versus PCE concentrations in Geo strain SZ cell suspension assays in the presence of 0, 10 and 60  $\mu\text{M}$   $\text{N}_2\text{O}$ .

| PCE ( $\mu\text{M}$ )   | $V^a$ | PCE ( $\mu\text{M}$ )                 | $V^a$ | PCE ( $\mu\text{M}$ )                 | $V^a$ |
|-------------------------|-------|---------------------------------------|-------|---------------------------------------|-------|
| No $\text{N}_2\text{O}$ |       | 10 $\mu\text{M}$ $\text{N}_2\text{O}$ |       | 60 $\mu\text{M}$ $\text{N}_2\text{O}$ |       |
| 3.6                     | 4.1   | 10.9                                  | 19.3  | 4.9                                   | 5.3   |
| 6.3                     | 11.7  | 13.1                                  | 24.7  | 9.5                                   | 8.5   |
| 11.7                    | 24.0  | 18.5                                  | 25.3  | 15.3                                  | 13.6  |
| 15.7                    | 28.5  | 29.0                                  | 28.5  | 52.7                                  | 20.0  |
| 42.2                    | 48.4  | 41.3                                  | 36.8  | 59.4                                  | 22.1  |
| 60.8                    | 60.3  | 57.0                                  | 41.2  | 69.5                                  | 24.3  |
| 83.6                    | 63.9  | 63.6                                  | 44.7  | 87.5                                  | 24.5  |
| 97.8                    | 65.0  | 74.1                                  | 45.0  | 110.4                                 | 25.5  |
| 110.2                   | 61.3  | 91.6                                  | 51.9  | 124.3                                 | 25.4  |
| 122.0                   | 58.4  | 109.7                                 | 47.6  | 146.5                                 | 25.2  |
| 133.9                   | 68.0  |                                       |       |                                       |       |
| 153.9                   | 56.7  |                                       |       |                                       |       |

<sup>a</sup> Initial dechlorination rate (nmol  $\text{Cl}^-$  released  $\text{min}^{-1}$  mg protein $^{-1}$ ).

**Table S3.** Initial cDCE-to-VC dechlorination rate versus cDCE concentrations in *Dhc* strain BAV1 cell suspension assays in the presence of 0, 10 and 60  $\mu\text{M}$   $\text{N}_2\text{O}$ .

| cDCE ( $\mu\text{M}$ )  | $V^a$ | cDCE ( $\mu\text{M}$ )                | $V^a$ | cDCE ( $\mu\text{M}$ )                | $V^a$ |
|-------------------------|-------|---------------------------------------|-------|---------------------------------------|-------|
| No $\text{N}_2\text{O}$ |       | 10 $\mu\text{M}$ $\text{N}_2\text{O}$ |       | 60 $\mu\text{M}$ $\text{N}_2\text{O}$ |       |
| 2.7                     | 15.4  | 1.9                                   | 10.3  | 1.7                                   | 2.4   |
| 4.4                     | 27.6  | 5.0                                   | 16.9  | 5.4                                   | 4.9   |
| 7.5                     | 48.6  | 8.4                                   | 23.6  | 10.1                                  | 7.2   |
| 17.5                    | 53.2  | 17.5                                  | 36.4  | 17.5                                  | 14.2  |
| 31.7                    | 79.5  | 31.7                                  | 38.5  | 29.5                                  | 18.5  |
| 64.5                    | 93.1  | 63.4                                  | 54.6  | 63.4                                  | 24.7  |
| 174.9                   | 110.3 | 161.8                                 | 75.4  | 208.8                                 | 39.6  |
| 250.3                   | 106.5 | 211.0                                 | 80.5  | 225.2                                 | 42.6  |
| 377.1                   | 111.4 | 488.6                                 | 86.4  | 424.6                                 | 42.1  |

<sup>a</sup> Initial dechlorination rate ( $\text{nmol Cl}^- \text{ released min}^{-1} \text{ mg protein}^{-1}$ ).

**Table S4.** Initial VC-to-ethene dechlorination rate versus VC concentrations in *Dhc* strain BAV1 cell suspension assays in the presence of 0, 15 and 50  $\mu\text{M}$   $\text{N}_2\text{O}$ .

| VC ( $\mu\text{M}$ )    | $V^a$ | VC ( $\mu\text{M}$ )                  | $V^a$ | VC ( $\mu\text{M}$ )                  | $V^a$ |
|-------------------------|-------|---------------------------------------|-------|---------------------------------------|-------|
| No $\text{N}_2\text{O}$ |       | 15 $\mu\text{M}$ $\text{N}_2\text{O}$ |       | 50 $\mu\text{M}$ $\text{N}_2\text{O}$ |       |
| 4.4                     | 18.5  | 3.2                                   | 7.9   | 4.1                                   | 3.0   |
| 13.9                    | 53.3  | 11.4                                  | 19.2  | 11.3                                  | 7.0   |
| 23.5                    | 72.4  | 22.0                                  | 25.2  | 21.7                                  | 10.9  |
| 56.3                    | 89.9  | 51.4                                  | 34.4  | 47.3                                  | 14.2  |
| 98.5                    | 104.3 | 87.9                                  | 39.2  | 72.6                                  | 16.7  |
| 116.0                   | 107.6 | 118.0                                 | 42.6  | 113.3                                 | 17.1  |
| 149.0                   | 107.6 | 126.0                                 | 43.5  | 140.8                                 | 20.9  |

<sup>a</sup> Initial dechlorination rate ( $\text{nmol Cl}^- \text{ released min}^{-1} \text{ mg protein}^{-1}$ ).

**Table S5.** Statistical parameters ( $R^2$ , AICc and  $Sy.x$  values) used for determining the best-fit inhibition model and inhibition constants in cell suspensions amended with  $N_2O$  as inhibitor.

| Culture         | Substrate | Inhibitor | Tested models         | Statistical Parameters |                |              | $K_i$ ( $\mu M$ )                |
|-----------------|-----------|-----------|-----------------------|------------------------|----------------|--------------|----------------------------------|
|                 |           |           |                       | $R^2$                  | AICc           | $Sy.x$       |                                  |
| Geo strain SZ   | PCE       | $N_2O$    | <b>Noncompetitive</b> | <b>0.971</b>           | <b>81.338</b>  | <b>3.350</b> | <b><math>40.8 \pm 3.8</math></b> |
|                 |           |           | Uncompetitive         | 0.966                  | 86.477         | 3.639        | $29.1 \pm 3.1$                   |
|                 |           |           | Competitive           | 0.944                  | 102.041        | 4.678        | $9.2 \pm 1.9$                    |
| Dhc strain BAV1 | cDCE      | $N_2O$    | <b>Noncompetitive</b> | <b>0.968</b>           | <b>107.060</b> | <b>6.422</b> | <b><math>21.2 \pm 3.5</math></b> |
|                 |           |           | Competitive           | 0.952                  | 117.928        | 7.853        | $2.3 \pm 0.5$                    |
|                 |           |           | Uncompetitive         | 0.938                  | 124.696        | 8.902        | $25.9 \pm 2.9$                   |
| Dhc strain BAV1 | VC        | $N_2O$    | <b>Noncompetitive</b> | <b>0.996</b>           | <b>43.791</b>  | <b>2.386</b> | <b><math>9.6 \pm 0.4</math></b>  |
|                 |           |           | Uncompetitive         | 0.986                  | 69.426         | 4.393        | $7.0 \pm 0.6$                    |
|                 |           |           | Competitive           | 0.974                  | 82.243         | 5.961        | $1.6 \pm 0.3$                    |

$R^2$ , the Coefficient of Determination, gives information about the fit of the measured data to the different models tested, and the model with highest  $R^2$  value provides the best data fit.

The AICc (i.e., corrected Akaike's Information Criterion) offers an estimate of the relative quality of tested models, and the model with the lowest AICc value represents the relative best fit among the tested models.

The  $Sy.x$  represents the Standard Deviation of the Residuals, and the model with the lowest  $Sy.x$  value provides best prediction of the data.

In all cell suspensions assays, the noncompetitive model (highlighted in bold) gave the highest  $R^2$  and the lowest AIC and  $Sy.x$  values.

**Table S6.** Initial versus final amounts of  $N_2O$  measured of Geo strain SZ and Dhc strain BAV1 cultures growing with chlorinated ethenes as electron acceptors in 160-mL vessels with 60 mL headspace.

| Culture         | $e^-$ Acceptor | Inhibitor<br>$N_2O$ ( $\mu M$ ) | Inhibitor<br>$N_2O$ (total $\mu mol/vessel$ ) |                |
|-----------------|----------------|---------------------------------|-----------------------------------------------|----------------|
|                 |                |                                 | Initial                                       | Final          |
| Geo strain SZ   | PCE            | 9.5                             | $2.1 \pm 0.1$                                 | $2.1 \pm 0.3$  |
|                 |                | 19.1                            | $4.1 \pm 0.1$                                 | $3.9 \pm 0.5$  |
|                 |                | 57.3                            | $12.4 \pm 1.0$                                | $12.6 \pm 1.4$ |
| Dhc strain BAV1 | cDCE           | 9.5                             | $2.1 \pm 0.2$                                 | $2.1 \pm 0.3$  |
|                 |                | 29.0                            | $6.3 \pm 0.5$                                 | $6.8 \pm 0.8$  |
|                 |                | 57.3                            | $12.4 \pm 0.5$                                | $12.2 \pm 0.4$ |
| Dhc strain BAV1 | VC             | 2.9                             | $0.6 \pm 0.1$                                 | $0.6 \pm 0.1$  |
|                 |                | 5.7                             | $1.2 \pm 0.1$                                 | $1.2 \pm 0.2$  |
|                 |                | 19.1                            | $4.1 \pm 0.6$                                 | $4.1 \pm 0.4$  |

Error values represent the standard deviation based on measurements of triplicate cultures.

## Supplementary Figures

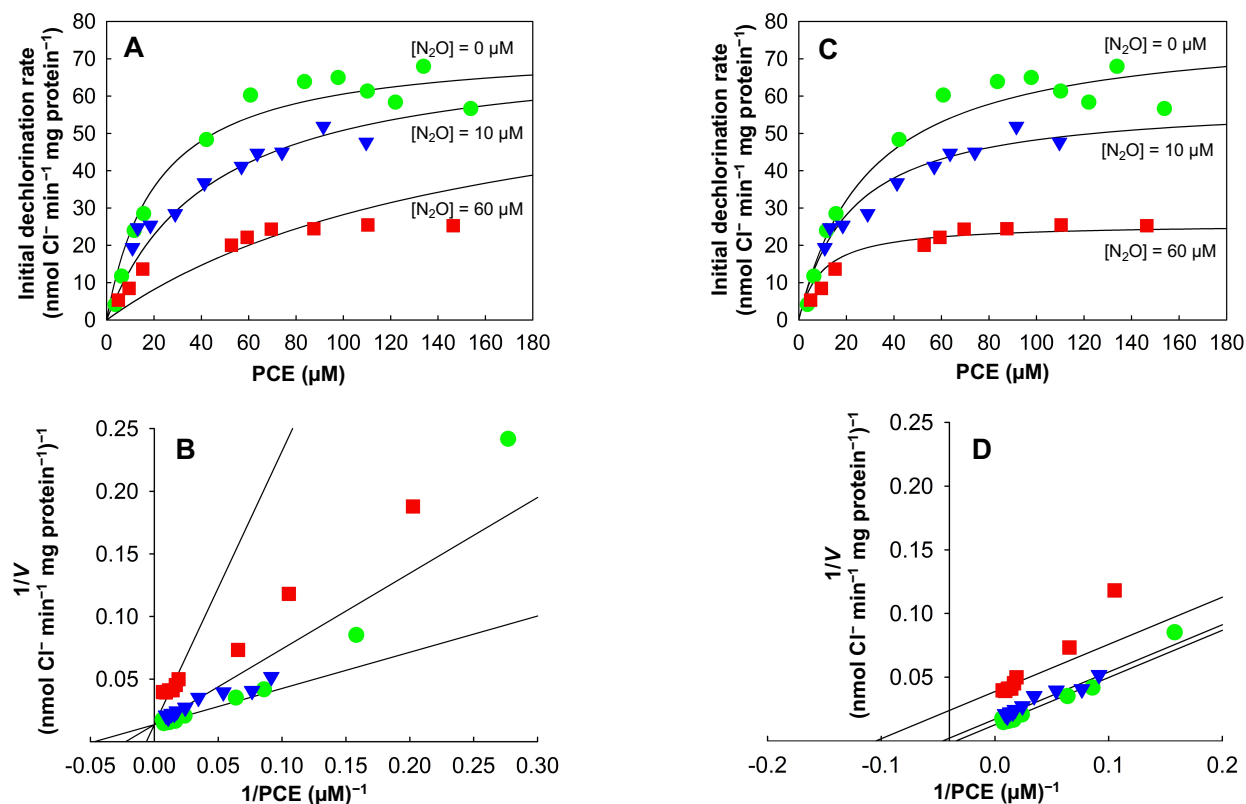

**Figure S1.** Competitive and uncompetitive N<sub>2</sub>O inhibition kinetics of PCE-to-cDCE reductive dechlorination in *Geo* strain SZ cell suspensions. **Panels A and B** show Michaelis-Menten and Lineweaver-Burk plots, respectively, of competitive N<sub>2</sub>O inhibition of PCE-to-cDCE reductive dechlorination in *Geo* strain SZ cell suspensions without and in the presence of 10 and 60 μM N<sub>2</sub>O. **Panels C and D** depict Michaelis-Menten and Lineweaver-Burk plots, respectively, of uncompetitive N<sub>2</sub>O inhibition of PCE-to-cDCE reductive dechlorination in *Geo* strain SZ cell suspensions without and in the presence of 10 and 60 μM N<sub>2</sub>O. Solid lines represent the model simulation to each data set based on the nonlinear regression using the SigmaPlot 13 Enzyme Kinetic Module. Solid green circles represent rate data measured in the absence of N<sub>2</sub>O; solid blue triangles show rate data measured in the presence of 10 μM N<sub>2</sub>O; and solid red squares show rate data measured in the presence of 60 μM N<sub>2</sub>O.

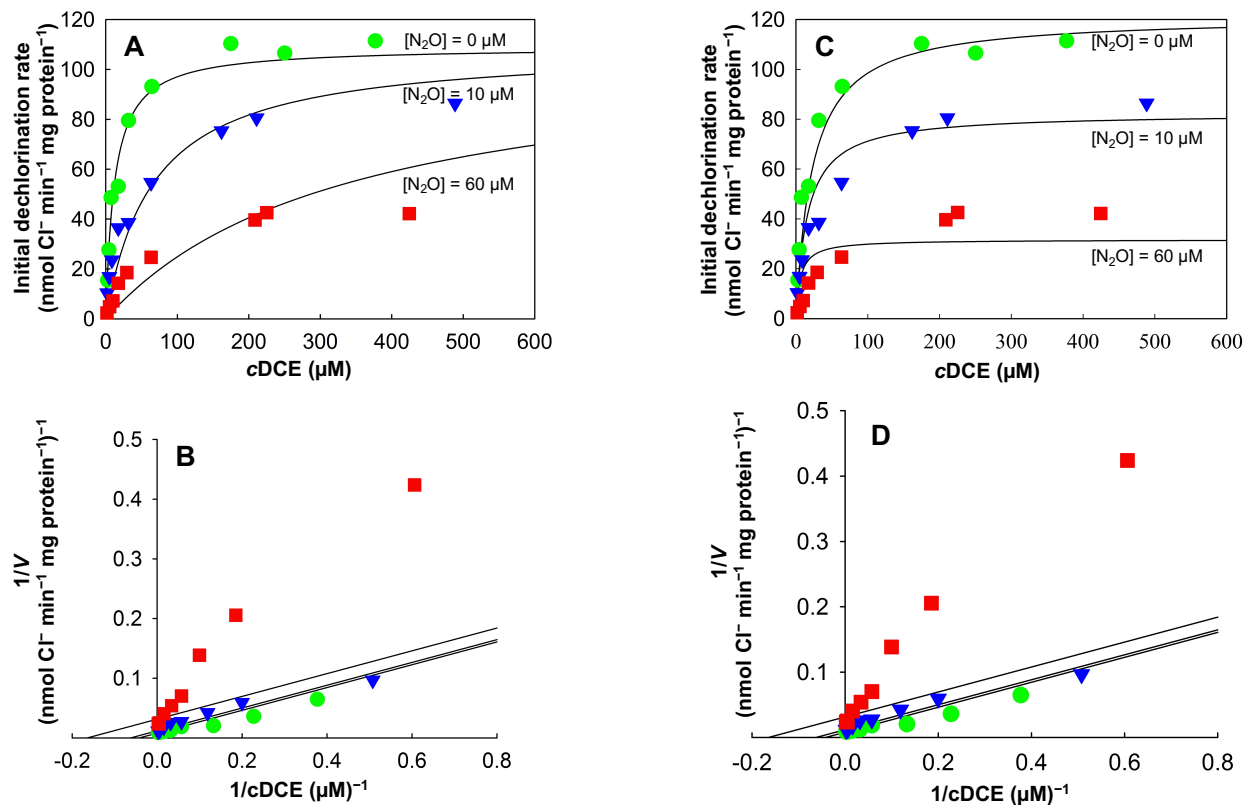

**Figure S2.** Competitive and uncompetitive N<sub>2</sub>O inhibition kinetics of cDCE-to-VC reductive dechlorination in *Dhc* strain BAV1 cell suspensions. **Panels A and B** show Michaelis-Menten and Lineweaver-Burk plots, respectively, of competitive N<sub>2</sub>O inhibition of cDCE-to-VC reductive dechlorination in *Dhc* strain BAV1 cell suspensions without and in the presence of 10 and 60 μM N<sub>2</sub>O. **Panels C and D** depict Michaelis-Menten and Lineweaver-Burk plots, respectively, of uncompetitive N<sub>2</sub>O inhibition of VC-to ethene reductive dechlorination in *Dhc* strain BAV1 cell suspensions without and in the presence of 10 and 60 μM N<sub>2</sub>O. Solid lines represent the model simulation to each data set based on the nonlinear regression using the SigmaPlot 13 Enzyme Kinetic Module. Solid green circles represent rate data measured in the absence of N<sub>2</sub>O; solid blue triangles show rate data measured in the presence of 10 μM N<sub>2</sub>O; and solid red squares show rate data measured in the presence of 60 μM N<sub>2</sub>O.

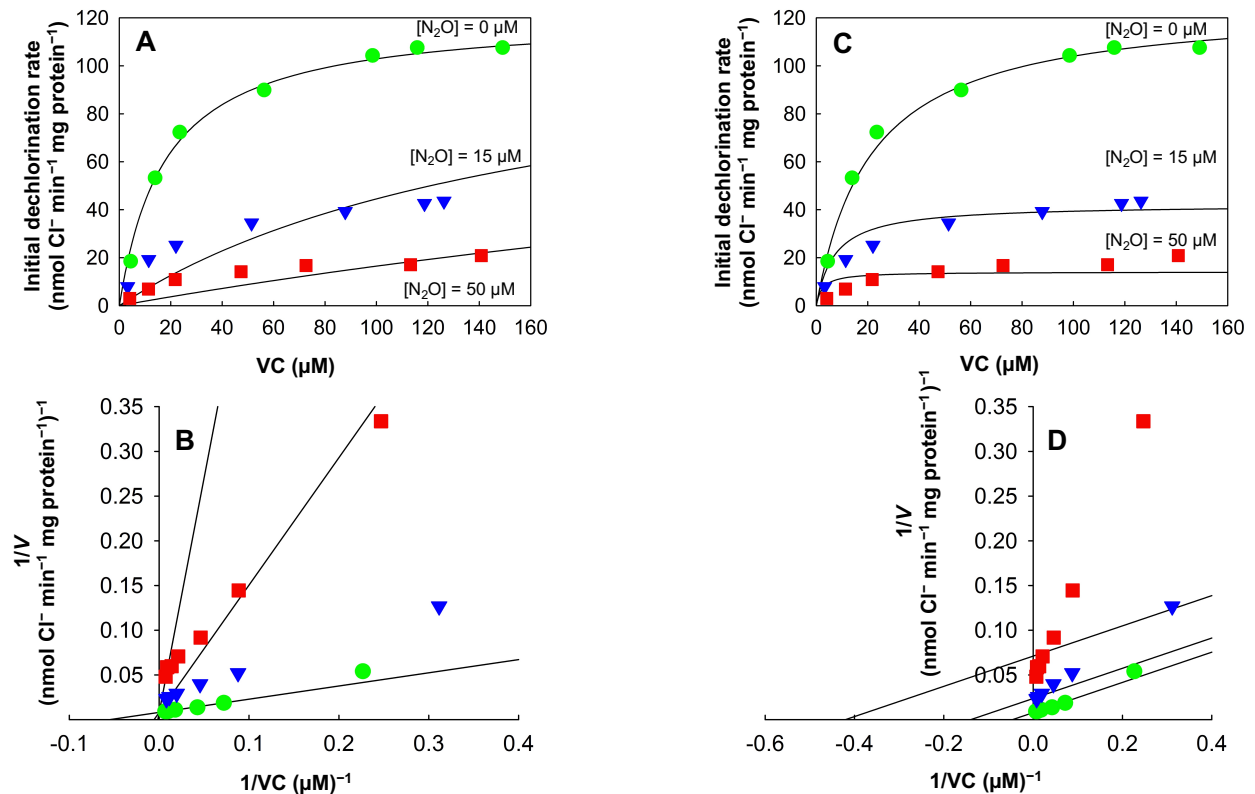

**Figure S3.** Competitive and uncompetitive N<sub>2</sub>O inhibition kinetics of VC-to-ethene reductive dechlorination in *Dhc* strain BAV1 cell suspensions. **Panels A and B** show Michaelis-Menten and Lineweaver-Burk plots, respectively, of competitive N<sub>2</sub>O inhibition of VC-to-ethene reductive dechlorination in cell suspensions of *Dhc* strain BAV1 without and in the presence of 15 and 50 μM N<sub>2</sub>O. **Panels C and D** depict Michaelis-Menten and Lineweaver-Burk plots, respectively, of uncompetitive N<sub>2</sub>O inhibition of VC-to-ethene reductive dechlorination in *Dhc* strain BAV1 cell suspensions without and in the presence of 15 and 50 μM N<sub>2</sub>O. Solid lines represent the model simulation to each data set based on the nonlinear regression using the SigmaPlot 13 Enzyme Kinetic Module. Solid green circles represent rate data measured in the absence of N<sub>2</sub>O; solid blue triangles show rate data measured in the presence of 15 μM N<sub>2</sub>O; and solid red squares show rate data measured in the presence of 50 μM N<sub>2</sub>O.
